# Supplementary material
Source: Springer Nature journal article supplement (https://www.springermedizin.de/resource/supplementary/12877_2006_66_MOESM2_ESM.pdf/9441134)
Supplement: MOESM2 [file 9441134]

|                                                                                                                                                                                                                 |                                                                                                                                                                                                                        |
|-----------------------------------------------------------------------------------------------------------------------------------------------------------------------------------------------------------------|------------------------------------------------------------------------------------------------------------------------------------------------------------------------------------------------------------------------|
| <b>Profil #1</b>                                                                                                                                                                                                | <b>Profil #8</b>                                                                                                                                                                                                       |
| Need supervision for housekeeping and occasional help for heavy housework; difficulty with meal preparation, using transportation and managing budgeting.                                                       | Moderate alterations in cognitive functions; unable to make decisions; minor behavioural problems; difficulty in ADL; need help for washing and grooming; need supervision in mobility functions.                      |
| <b>Profil #2</b>                                                                                                                                                                                                | <b>Profil #9</b>                                                                                                                                                                                                       |
| Need help to do laundry, daily housework and preparing meals, shops but need delivery service, difficulty using transportation and managing budgets.                                                            | Severe alterations in mobility functions; may need help in washing, dressing and grooming; may need a wheelchair; present occasional incontinence; very minor deficits in all mental functions.                        |
| <b>Profil #3</b>                                                                                                                                                                                                | <b>Profil #10</b>                                                                                                                                                                                                      |
| Completely dependant for housekeeping, preparing meals, shopping and laundry; can answer telephone only with memorized or emergency numbers. Minor recent memory deficit. Difficulties in washing and grooming. | Severe alterations in cognitive functions with moderate behavioral problems; need help in ADL, but walk independently inside; need supervision for toilet; problems expressing themselves (speech/language problems).  |
| <b>Profil #4</b>                                                                                                                                                                                                | <b>Profil #11</b>                                                                                                                                                                                                      |
| Minor alterations in mobility functions; need regular IADL help; mainly independent in ADL, except for washing and grooming; independent in mental functions.                                                   | Mixed and severe alterations in mobility and cognitive functions; need help for transfers; dependent in washing, dressing and grooming; maintain bowel functions, but need help using the toilet; most in wheelchairs. |
| <b>Profil #5</b>                                                                                                                                                                                                | <b>Profil #12</b>                                                                                                                                                                                                      |
| Minor alterations in some cognitive functions, but poor judgment; dependent in IADL; difficulty washing and grooming; independent in mobility.                                                                  | Mixed and severe alterations in mobility and cognitive functions; major behavioral problems; need help for washing, dressing and grooming; total incontinence; need help in mobility; minor sensory deficits.          |
| <b>Profil #6</b>                                                                                                                                                                                                | <b>Profil #13</b>                                                                                                                                                                                                      |
| Moderate alterations in mobility functions; difficulty eating and dressing; need help with washing and grooming; mainly independent mental functions, but minor deficits in memory and judgment.                | 13. Mixed and very severe alterations in mobility and cognitive functions; bedridden and dependency in ADL; severe cognitive impairment, but minor behavioral problems.                                                |
| <b>Profil #7</b>                                                                                                                                                                                                | <b>Profil #14</b>                                                                                                                                                                                                      |
| Moderate alterations in cognitive functions; unable to make decisions; minor behavioral problems; difficulty in ADL; need help for washing and grooming. Need supervision to walk outside.                      | Mixed and very severe alterations in mobility and cognitive functions; bedridden and dependency in ADL; severe cognitive impairment; moderate behavioural problems; moderate sensory deficits; unable to communicate.  |
